# Supplementary material for: Klf4 reverts developmentally programmed restriction of ground state pluripotency
Source: Oxford University Press journal article supplement (doi:10.1242/dev.030957), 2009-02-18
Supplement: dev030957supptables1.pdf [file dev030957supptables1.pdf]

**Table S1. Chimaera generation from *Klf4* Epi-iPS clones**

| Clone      | Blastocysts injected | Number born | Number of chimaeras | Coat chimaerism |        |     | Germline transmission                      |
|------------|----------------------|-------------|---------------------|-----------------|--------|-----|--------------------------------------------|
|            |                      |             |                     | High            | Medium | Low |                                            |
| K4C1       | 18                   | 1           | 1 (died)            |                 | 1      |     | N/A                                        |
| K4C12      | 40                   | 15          | 11                  | 3               | 6      | 2   | Two females, both 100%                     |
| K4C3Cre A3 | 30                   | 6           | 4                   | 4               |        |     | One female, 50%; second female lost litter |
| K4C3Cre D4 | 30                   | 5           | 2 (1 died)          |                 | 1      | 1   | Not tested                                 |
| K4C5Cre A5 | 46                   | 7 (4 died)  | 1                   |                 | 1      |     | One female, 100%                           |

EpiSCs are derived from hybrid 129×MF1 (Swiss albino) embryos. Chimaeras were generated in C57BL/6 blastocysts and bred with C57BL/6 males. Resultant non-black pups indicate germline transmission. The cell lines are female and therefore only female chimaeras were mated. K4C1 and K4C12 are Epi-iPS clones with the *Klf4* transgene; K4C3Cre and K4C5Cre clones are revertants of K4C3 and K4C5, respectively, after *Klf4* transgene deletion by Cre-mediated recombination. The percentages in the germline transmission column are of agouti pups (Epi-iPS cell-derived) in the first litters.
